# Supplementary material
Source: PubMed Central journal article supplement (PMC5378637)
Supplement: NIHMS832694-supplement-Supplement.pdf [file NIHMS832694-supplement-Supplement.pdf]

## **Supplemental Online Materials**

**SA1: Clinical Assessments**

**SA2: Criteria for factor models**

**SA3: Polygenic burden analyses**

**ST1. Sample size for each analysis**

**ST2. Items included in the TICS Inventory**

**ST3. Fit statistics for Exploratory Factor Analysis models**

**ST4. Correlations between 4 Factors model**

**ST5. Fit statistics and class size for the LCA solutions**

**ST6. Polygenic burden analyses of the symmetry and disinhibition endophenotypes**

**SF1. Scree Plot of Exploratory Analysis among probands**

**SF2. BIC values for LCA solutions**

**SF3. Probabilities of endorsing symptoms for LCA Classes**

**SF4. The phenotypic variance of symmetry and disinhibition explained by TS, OCD and ADHD Polygenic Risk Score (PRS)**

**SR1: Supplemental references.**

This supplementary material has been provided by the authors to give readers additional information about their work.

### SA1: *Clinical Assessments*

- Motor and phonic tics:* The TSAICG Tic and Comorbid Symptom Inventory (TICS) is a modified version of the Schedule for Tourette Syndrome and other Behavioral Syndromes (STOBS) [1] and includes an inventory of >80 motor and phonic tics. Participants were asked whether they had experienced each symptom in the past week, past six months, ever, or never. For analyses, the first three response options were collapsed, and dichotomous data (lifetime presence or absence) were analyzed. Tic frequency and severity TICS items were modified from the Yale Global Tic Severity Scale (YGTSS) [2]. Tic severity was characterized by frequency, intensity, and interference of symptoms. The highest score resulting from summing the modified severity questions is 15. As the TICS was modified during the study period to improve response rates, items not present for all participants were excluded from analysis.
- Obsessive-compulsive symptoms:* The TICS also includes an obsessive-compulsive symptom (OCD) checklist (>100 items) and questions about OCD severity modified from the Yale-Brown Obsessive-Compulsive Scale (Y-BOCS) [3, 4]. OCD symptoms were analyzed as lifetime presence or absence. Severity of obsessions and compulsions was characterized jointly (e.g., severity of obsessions and/or compulsions) by time, interference, and distress when symptoms were worst. The highest possible sum score of these items was 12. For Tic and OCD, major category items that subsumed a number of individual symptoms (e.g., “eye movements”) were excluded and the individual symptom items were used, as the use of both would result in overlapping data (i.e., participants could endorse the overall category “eye movements” and sub-category item “eye-blinking”). Additionally, vague items (e.g., “other motor tic”) and items that were not clearly OC (e.g., “pulls hair out”) were excluded. See eTable 1 for a list of included items.
- ADHD symptoms:* ADHD symptom data were collected using multiple self-report forms across different waves of data collection, including the Conners’ Parent Rating Scale [5], Conners’ Adult ADHD Rating Scales [6], and the Swanson, Nolan, and Pelham questionnaire [7]. For analyses, symptom questions from each rating scale were mapped onto the 18 DSM-IV-TR ADHD symptoms in a dichotomous fashion (i.e., each symptom was rated present or absent). For example, if the item “Has difficulty sustaining attention in tasks or play activities, more so than his or her friends” on the Conners’ Adult ADHD Rating Scales was marked as occurring “often” or “frequently”, the DSM-IV-TR symptom “often has difficulty sustaining attention in tasks or play activities” was marked as present. ADHD symptom severity was not examined because these data were not available.
- Comorbid psychiatric diagnoses:* Additional co-morbid psychiatric diagnoses were assessed through structured interviews. Adults were administered either the Structured Clinical Interview for DSM [SCID-I/NP version 2.0; 8] or the Schedule for Affective Disorders and Schizophrenia-Lifetime Version, Modified for the Study of Anxiety Disorders [SADS-LA; 9]. Children were administered the Schedule for Affective Disorders and Schizophrenia for School-Age Children-Present Lifetime Version [K-SADS-PL; 10] and Epidemiologic Version [11]. These data were only collected during the first wave of recruitment and were available for  $\geq 19\%$  of participants (see Table 1 in the manuscript). Psychiatric diagnoses other than TS, OCD, and ADHD were combined into categories; mood (depression and bipolar disorder), anxiety (panic, generalized anxiety, social phobia, and separation anxiety),

and disruptive behavior disorders (conduct disorder and oppositional defiant disorder). In order to arrive at a best-estimate set of diagnoses, two clinicians who were not involved in the interview process used DSM-IV-TR criteria to assign diagnoses using all available data (i.e., TICS, structured diagnostic interview data, clinical narrative, and medical records). A consensus diagnosis was achieved after discussion of discrepancies. If a consensus could not be reached, a third clinician's ratings were used to determine diagnostic status.

### SA2: Criteria for factor models

The null hypothesis of the traditional chi-square test is that the model is a good fit for the data; a significant result indicates that it is not a good fit for the data. This test has been shown to be sensitive to sample size and should not be used alone. The chi-square difference test compares the fit of two nested models where a significant result indicates the higher order model is a better fit. A RMSEA value of  $\leq .05$  suggests that the data fit the model well.

### SA3: Polygenic burden analyses

In order to assess the relationship between polygenic risk for TS and phenotypes assessed on the same samples, without risk of over-fitting, we conducted a stratified 11-fold cross-validation study using all individuals with genotype data (4232 TS cases and 8282 controls described previously[12-14]), regardless of whether they had symptom-level phenotype data available. TS cases were first separated into 6 groups based genotyping platforms and population stratification. For one group in which a large number of TS cases were genotyped on the same platform, the samples were further split randomly into 6 groups, resulting in a total of 11 TS case groups. The population- and genotyping platform- matched controls were then split into 11 groups along with each of the cases. Within each group, the same Quality Control (QC) steps were applied, and association tests were performed after adjusting for population stratification. To calculate TS Polygenic Risk Scores (PRS) for each individual within a group, a meta-analysis was performed on the other 10 groups, and both the risk allele and the corresponding effect size on each SNP were extracted from the meta-analysis result. The SNPs were then linkage disequilibrium (LD) pruned ( $r^2 < 0.2$ ). TS PRS on each individual sample was then calculated as the sum of the number of risk alleles at each locus weighted by the effect size over all LD pruned SNPs with GWAS p-value less than predetermined thresholds ( $p < 0.01, 0.1, 0.2, 0.3, 0.4, \text{ and } 0.5$ ) as described in [15].

The OCD PRS was developed in much the same way, except it was derived from an independent OCD sample and did not require cross-validation. The risk alleles and the corresponding effect sizes were extracted from an OCD GWAS discovery sample (1429 cases, 5083 controls, and 285 trios[16]). OCD PRS were calculated on TS samples at each predetermined GWAS p-value thresholds after LD pruning.

The ADHD PRS was derived in the same way as OCD PRS, except that the discovery sample is an ADHD sample[17], which includes 2064 trios, 896 cases, and 2455 controls.

For each PRS, the phenotype of interest was regressed on PRS of 947 TS cases who have both genotyping data and symptom-level phenotype data. To assess significance of the association, we fit the following linear regression model:

$$Y = \beta_0 + \beta_{PRS}X_{PRS} + \beta_{PC1}X_{PC1} + \dots + \beta_{PC4}X_{PC4} + \beta_{group\_i}X_{group\_i} \quad (\text{full model})$$

including the top four principal components as covariates to account for any residual confounding by population and site, and an indicator for cross-validation group to account for

group effect and genotyping/imputation platform effect. For OCD PRS and ADHD PRS, the indicator for cross-validation group was changed to the indicator for the genotyping/imputation platform. The percentage of phenotypic variance explained by PRS (i.e.  $R^2$  for PRS) is calculated by subtracting the  $R^2$  of full model by the  $R^2$  of the reduced model:

$$Y = \beta_0 + \beta_{PC1}X_{PC1} + \dots + \beta_{PC4}X_{PC4} + \beta_{group\_i}X_{group\_i} \text{ (reduced model).}$$

### ST1. Sample size for each analysis

| N    | Analysis                                    |
|------|---------------------------------------------|
| 1191 | EFA of original probands                    |
| 1191 | LCA of original probands                    |
| 3494 | LCA of original probands & family members   |
| 527  | CFA of validation probands                  |
| 882  | LCA of validation probands & family members |
| 3200 | Heritability analyses                       |
| 268  | Polygenic burden of factors                 |
| 294  | Polygenic burden of classes                 |

## ST2. TICS Inventory Items Included

---

### Tic Items

---

Blinking: eye blinking  
 squinting  
 Eye turn: a quick turn of the eyes  
 Eye rolling: rolling of the eyes to one side  
 Eyes wide: opening the eyes wide (briefly)  
 nose twitching  
 Tongue biting: biting the tongue  
 Lip chewing: chewing on lip(s)  
 licking the lips  
 lip pouting  
 teeth bearing  
 broadening the nostrils (as if smelling something)  
 smiling  
 sticking out the tongue  
 Touch chin: touching the chin to shoulder  
 Lift chin: lifting the chin up  
 throwing the head back (as if to get hair out of eyes)  
 Shoulder jerking: jerking a shoulder  
 Shoulder shrug: shrugging the shoulders as if to say "I dont know"  
 poking with fingers  
 passing hand through hair in a combing-like fashion  
 counting with fingers for no purpose  
 Repetitive writing: writing the same letter or word over and over  
 pulling back on the pencil while writing  
 kicking  
 skipping  
 knee-bending  
 Flex ankle: flexing or extending the ankle(s)  
 slower movements (e.g., taking a step forward and 2 steps back)  
 squatting  
 deep knee bending  
 tensing the abdomen  
 tensing the buttocks  
 touching  
 tapping  
 rude or obscene gestures (copropraxia)  
 unusual postures (dystonic tics)  
 bending or gyrating (e.g., bending over)  
 rotating or spinning  
 coughing  
 throat clearing  
 sniffing  
 whistling

animal or bird noises  
 syllables  
 rude or obscene words or phrases (coprolalia)  
 words  
 repeating what someone else said, either sounds, single words or phrases (e.g.,  
 repeating what is said on TV) (echolalia)  
 repeating something s/he said over and over again (palilalia)

---

#### OCD sxs

---

Has to keep a strict timetable or routine for doing ordinary activities  
 Does thing same way: Has to do things the same way every time  
 Cleaning compulsions: has compulsions that involve cleaning household items or other inanimate objects  
 Contamination compulsions: Does other things to prevent or remove contact with contaminants  
 Checks that did not or will not harm others  
 Checks no self-harm: Checks that did not or will not harm self  
 Checks nothing terrible: Checks that nothing terrible did happen or will happen  
 Checks mistakes: checks that did not make mistakes  
 Checks things: checks (more than once) on things such as gas (stove, oven, heaters) and electrical (coffee/tea pots, curling iron) appliances, door locks, etc.  
 Re-reads or re-writes things  
 Repeat compulsions: Needs to repeat routine activities (like going in and out of a doorway or getting up and down from a chair)  
 repeating acts  
 Has counting compulsions  
 Ordering compulsions: Has ordering or arranging compulsions  
 Symmetry compulsions: Needs certain things to be symmetrical  
 Even-up compulsions: Needs to have certain things evened-up  
 Hoarding compulsions: Has compulsions to hoard or collect things  
 Mental rituals: Has mental rituals (other than checking or counting) done intentionally to feel better  
 Needs to tell, ask, or confess things  
 Need explore: Has experienced a strong need to explore surroundings  
 Needs to touch, tap, or rub things  
 Prevent harm compulsions: Takes measures (other than checking) to prevent harm to self or others, or terrible consequences  
 Has superstitious behaviors  
 Has silly thoughts that can influence the outcome of some events if does certain things  
 Fears harming self: Fears that might harm self  
 Fears harming others: Fears that might harm other people  
 Violent images: Has violent or horrific images in mind  
 Fears obscenities: Fears blurting out obscenities  
 Fears impulse: Fears acting on an unwanted impulse  
 Fears stealing: Fears will steal things

Fears harm others: Fears that will harm other because not careful enough (like a hit-and-run motor vehicle accident)

Fears responsible something terrible: fears being responsible for something else terrible happening (such as fire or burglary)

Reckless urges: Has experienced unreasonable urges to do sudden and reckless things (behaviors)

Urges destroy: Has experienced unreasonable urges to be destructive

Urges self-injure: Has experienced unreasonable urges to injure self

Urges injure others: Has experienced urges to injure or mutilate others

Urges offend: Has experienced unreasonable urges to offend others

Bodily waste obsessions: Is concerned or disgusted with bodily waste or secretions (like urine, feces, or saliva)

Germ obsessions: Is concerned with dirt or germs

Environmental contaminants obsessions: Is excessively concerned with environmental contaminants (like asbestos, radiation, or toxic waste)

Animal obsessions: Is excessively concerned with animals (like insects)

Sticky obsessions: Is bothered by sticky substances or residues

Contamination obsessions: Is concerned will get ill because of contamination

Sexual obsessions: Has forbidden or upsetting sexual thoughts, images, or impulses

Hoarding obsessions: Has obsessions about hoarding or saving things

Religious obsessions: Is concerned with upsetting thoughts having to do with God, religious teachings or beliefs

Morality obsessions: Is excessively concerned with right or wrong (morality)

Exactness obsession: Has obsessions about exactness

Symmetry obsessions: Has obsessions about symmetry

Lining up obsessions: Often has thoughts about lining things up

Has unreasonable, silly thoughts that may influence the outcome of some events if does certain things

Even-up obsessions: Often has thoughts about evening things up

Remember compulsions: Feels like needs to know or remember certain things

Fears losing things

Lucky numbers: Has lucky or unlucky numbers

Has colors with special significance

Has superstitious fears

Illness obsessions: Is concerned with illness or disease

Is excessively concerned with a part of body or an aspect of appearance

---

#### ADHD sx's

---

No follow through: Often does not follow through on instructions and fails to finish schoolwork, chores, or duties in the workplace

Trouble organizing: Often has trouble organizing activities.

Forgetful: Is often forgetful in daily activities

No attend detail: Often does not give close attention to details or makes careless mistakes in schoolwork, work, or other activities.

Avoids mental effort: Often avoids, dislikes, or doesn't want to do things that take a lot of mental effort for a long period of time

Loses things: Often loses things needed for tasks and activities

Distractible: Is often easily distracted

Trouble attending: Often has trouble keeping attention on tasks or play activities.

No listen: Often does not seem to listen when spoken to directly.

On the go: Is often "on the go" or often acts as if "driven by a motor"

Runs: Often excessively runs about or climbs when and where it is not

Blurts out: Often blurts out answers before questions have been finished

Interrupts: Often interrupts or intrudes on others

Out of seat: Often gets up from seat when remaining in seat is expected

Fidgets: Often fidgets with hands or feet or squirms in seat when sitting still is expected

Trouble waiting: Often has trouble waiting one's turn

Trouble quiet: Often has trouble playing or doing leisure activities quietly

Talks excessively: Often talks excessively

---



### ST3. Fit Statistics for Exploratory Principal Components Models

| Model                                      | Number of free parameters | $\chi^2$ <sup>a</sup> | df   | RMSEA | 95% CI    |
|--------------------------------------------|---------------------------|-----------------------|------|-------|-----------|
| <b>Tic, OCD &amp; ADHD</b>                 |                           |                       |      |       |           |
| <b>Individual models</b>                   |                           |                       |      |       |           |
| 1-factor                                   | 126                       | 25593.04              | 7749 | 0.04  | 0.04-0.05 |
| 2-factor                                   | 251                       | 15479.84              | 7624 | 0.03  | 0.03-0.03 |
| 3-factor                                   | 375                       | 12267.26              | 7500 | 0.02  | 0.02-0.02 |
| 4-factor                                   | 498                       | 11153.25              | 7377 | 0.02  | 0.02-0.02 |
| 5-factor                                   | 620                       | 10303.40              | 7255 | 0.02  | 0.02-0.02 |
| 6-factor                                   | 741                       | 9524.06               | 7134 | 0.02  | 0.02-0.02 |
| 7-factor                                   | 861                       | 8924.75               | 7014 | 0.02  | 0.01-0.02 |
| 8-factor                                   | 980                       | 8540.10               | 6895 | 0.01  | 0.01-0.02 |
| <b>Comparisons between adjacent models</b> |                           |                       |      |       |           |
| 1-factor against 2-factor                  |                           | 3675.40               | 125  |       |           |
| 2-factor against 3-factor                  |                           | 1739.07               | 124  |       |           |
| 3-factor against 4-factor                  |                           | 962.81                | 123  |       |           |
| 4-factor against 5-factor                  |                           | 818.35                | 122  |       |           |
| 5-factor against 6-factor                  |                           | 800.54                | 121  |       |           |
| 6-factor against 7-factor                  |                           | 660.89                | 120  |       |           |
| 7-factor against 8-factor                  |                           | 446.70                | 119  |       |           |
| <b>Tic &amp; OCD</b>                       |                           |                       |      |       |           |
| <b>Individual models</b>                   |                           |                       |      |       |           |
| 1-factor                                   | 108                       | 13497.08              | 5670 | 0.03  | 0.03-0.04 |
| 2-factor                                   | 215                       | 10284.00              | 5563 | 0.03  | 0.03-0.03 |
| 3-factor                                   | 321                       | 8865.20               | 5457 | 0.02  | 0.02-0.02 |
| 4-factor                                   | 426                       | 7901.76               | 5352 | 0.02  | 0.02-0.02 |
| 5-factor                                   | N/A                       |                       |      |       |           |
| 6-factor                                   | 633                       | 6761.22               | 5145 | 0.02  | 0.02-0.02 |
| 7-factor                                   | 735                       | 6412.45               | 5043 | 0.02  | 0.01-0.02 |
| 8-factor                                   | 836                       | 6126.15               | 4942 | 0.01  | 0.01-0.02 |
| <b>Comparisons between adjacent models</b> |                           |                       |      |       |           |
| 1-factor against 2-factor                  |                           | 1702.68               | 107  |       |           |
| 2-factor against 3-factor                  |                           | 1148.51               | 106  |       |           |
| 3-factor against 4-factor                  |                           | 792.33                | 105  |       |           |
| 6-factor against 7-factor                  |                           | 391.18                | 102  |       |           |
| 7-factor against 8-factor                  |                           | 347.99                | 101  |       |           |

The baseline  $\chi^2$  (df) model fit for the baseline model was 52448.415 (7875).

<sup>a</sup> All  $\chi^2$  values are significant at  $p < .0001$ .

RMSEA, root mean square error of approximation

**ST4. Correlations between 4 Factors.**

---

|    | <b>F1<br/>tics</b> | <b>F2<br/>OCS</b> | <b>F3</b>         | <b>F4<br/>symmetry</b> |
|----|--------------------|-------------------|-------------------|------------------------|
| F1 | 1                  |                   |                   |                        |
| F2 | 0.31 <sup>a</sup>  | 1                 |                   |                        |
| F3 | 0.16 <sup>a</sup>  | 0.08              | 1                 |                        |
| F4 | 0.30 <sup>a</sup>  | 0.46 <sup>a</sup> | 0.17 <sup>a</sup> | 1                      |

---

<sup>a</sup> indicates significant correlations  $p \leq 0.05$

**ST5. Fit statistics and class size for LCA solutions**

|                                                   | <b>2 Classes</b> | <b>3 Classes</b> | <b>4 Classes</b> | <b>5 Classes</b> | <b>6 Classes</b> |
|---------------------------------------------------|------------------|------------------|------------------|------------------|------------------|
| <b>Probands</b>                                   |                  |                  |                  |                  |                  |
| Entropy                                           | 0.95             | 0.94             | <b>0.95</b>      | 0.94             | 0.95             |
| LMR p-value                                       | ≤.001            | ≤.001            | <b>≤.01</b>      | .25              | .80              |
| BIC                                               | 136888           | 133976           | <b>132598</b>    | 132087           | 131836           |
| n of LC1                                          | 499              | 345              | <b>191</b>       | 261              | 113              |
| n of LC2                                          | 692              | 402              | <b>243</b>       | 264              | 248              |
| n of LC3                                          |                  | 444              | <b>396</b>       | 293              | 232              |
| n of LC4                                          |                  |                  | <b>361</b>       | 128              | 286              |
| n of LC5                                          |                  |                  |                  | 245              | 177              |
| n of LC6                                          |                  |                  |                  |                  | 135              |
| <b>Probands &amp; Family members</b>              |                  |                  |                  |                  |                  |
| Entropy                                           | 0.96             | 0.95             | 0.94             | <b>0.95</b>      | 0.95             |
| LMR p-value                                       | <0.001           | <0.001           | 0.001            | <b>0.27</b>      | 0.70             |
| BIC                                               | 306725           | 296645           | 290822           | <b>286873</b>    | 284800           |
| n of LC1                                          | 1467             | 773              | 567              | <b>456</b>       | 336              |
| n of LC2                                          | 2027             | 1205             | 970              | <b>541</b>       | 589              |
| n of LC3                                          |                  | 1516             | 612              | <b>612</b>       | 1175             |
| n of LC4                                          |                  |                  | 1345             | <b>604</b>       | 578              |
| n of LC5                                          |                  |                  |                  | <b>1281</b>      | 542              |
| n of LC6                                          |                  |                  |                  |                  | 274              |
| <b>Replication: Probands &amp; Family members</b> |                  |                  |                  |                  |                  |
| Entropy                                           | 0.97             | 0.97             | 0.96             | <b>0.97</b>      | -                |
| LMR p-value                                       | <0.001           | <0.01            | 0.04             | <b>0.71</b>      | -                |
| BIC                                               | 90870            | 87464            | 86334            | <b>85608</b>     | -                |
| n of LC1                                          | 521              | 186              | 251              | <b>356</b>       | -                |
| n of LC2                                          | 361              | 361              | 190              | <b>114</b>       | -                |
| n of LC3                                          |                  | 335              | 258              | <b>174</b>       | -                |
| n of LC4                                          |                  |                  | 183              | <b>169</b>       | -                |
| n of LC5                                          |                  |                  |                  | <b>169</b>       | -                |
| n of LC6                                          |                  |                  |                  |                  | -                |

LMR = Lo, Mendel, and Rubin parametric likelihood ratio test

BIC = Bayesian Information Criterion

Note: Bold lettering indicates best fitting solution based on low BIC, significant LMR results, and clinically interpretable classes. The loglikelihood value for the 6-class model using the replication sample data failed to replicate after 640 attempts.

## ST6. Polygenic burden analyses of the symmetry and disinhibition endophenotypes.

| PRS  | GWAS p-value cutoff | Number of SNPs | Symmetry       |       | Disinhibition  |       | Disinhibition regardless of hoarding symptoms |       |
|------|---------------------|----------------|----------------|-------|----------------|-------|-----------------------------------------------|-------|
|      |                     |                | R <sup>2</sup> | P     | R <sup>2</sup> | P     | R <sup>2</sup>                                | P     |
| TS   | P < 0.01            | 5,756          | -0.06%         | 0.433 | -0.05%         | 0.513 | -0.03%                                        | 0.621 |
|      | P < 0.1             | 34,702         | 0.33%          | 0.074 | 0.01%          | 0.803 | 0.03%                                         | 0.593 |
|      | P < 0.2             | 57,942         | 0.27%          | 0.107 | 0.01%          | 0.806 | 0.04%                                         | 0.521 |
|      | P < 0.3             | 77,267         | 0.46%          | 0.036 | 0.08%          | 0.391 | 0.14%                                         | 0.257 |
|      | P < 0.4             | 93,706         | 0.55%          | 0.022 | 0.12%          | 0.295 | 0.19%                                         | 0.183 |
|      | P < 0.5             | 107,559        | 0.57%          | 0.020 | 0.18%          | 0.194 | 0.27%                                         | 0.109 |
| OCD  | P < 0.01            | 4,871          | -0.07%         | 0.417 | 0.52%          | 0.026 | 0.55%                                         | 0.023 |
|      | P < 0.1             | 31,036         | -0.03%         | 0.583 | 0.46%          | 0.036 | 0.56%                                         | 0.021 |
|      | P < 0.2             | 52,672         | -0.10%         | 0.335 | 0.18%          | 0.186 | 0.25%                                         | 0.125 |
|      | P < 0.3             | 70,463         | -0.13%         | 0.260 | 0.12%          | 0.281 | 0.17%                                         | 0.202 |
|      | P < 0.4             | 85,463         | -0.10%         | 0.318 | 0.17%          | 0.199 | 0.22%                                         | 0.148 |
|      | P < 0.5             | 98,105         | -0.11%         | 0.307 | 0.17%          | 0.198 | 0.23%                                         | 0.138 |
| ADHD | P < 0.01            | 3,437          | -0.19%         | 0.180 | -0.09%         | 0.355 | -0.03%                                        | 0.579 |
|      | P < 0.1             | 24,470         | 0.00%          | 0.934 | 0.04%          | 0.525 | 0.08%                                         | 0.387 |
|      | P < 0.2             | 42,954         | 0.03%          | 0.617 | 0.13%          | 0.259 | 0.19%                                         | 0.182 |
|      | P < 0.3             | 58,796         | -0.04%         | 0.523 | 0.10%          | 0.337 | 0.13%                                         | 0.271 |
|      | P < 0.4             | 72,823         | -0.05%         | 0.511 | 0.18%          | 0.194 | 0.22%                                         | 0.146 |
|      | P < 0.5             | 84,975         | -0.05%         | 0.475 | 0.23%          | 0.137 | 0.30%                                         | 0.095 |

R<sup>2</sup> = percentage of phenotypic variance explained in the target sample by the Polygenic Risk Score (PRS) in the TS, OCD or ADHD discovery sample. A negative value indicates a negative correlation between PRS and the target phenotype of interest.

P = the significance level of the correlation between TS, OCD, or ADHD discovery sample PRS and the target phenotype of interest after adjusting for population stratification and any genotyping or imputation platform effects.

**SF1. Scree Plot of Exploratory Principal-Components Analysis among Probands (N=1191)**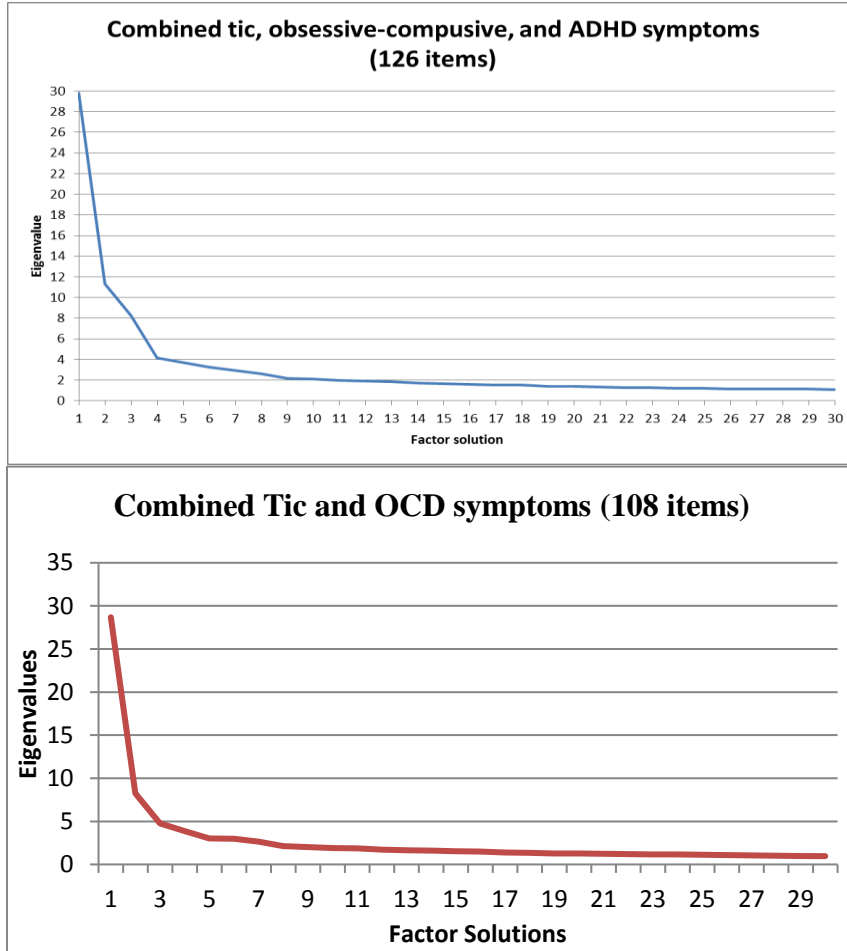

Note: Horizontal axes have been truncated to allow clear visualization of the inflection point (“elbow”) of each scree plot.

**SF2. Graph of Bayesian information criterion (BIC) values for LCA solutions**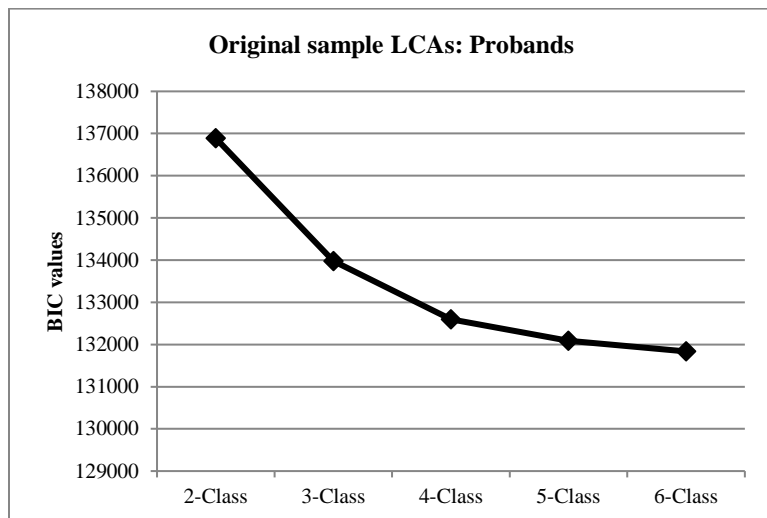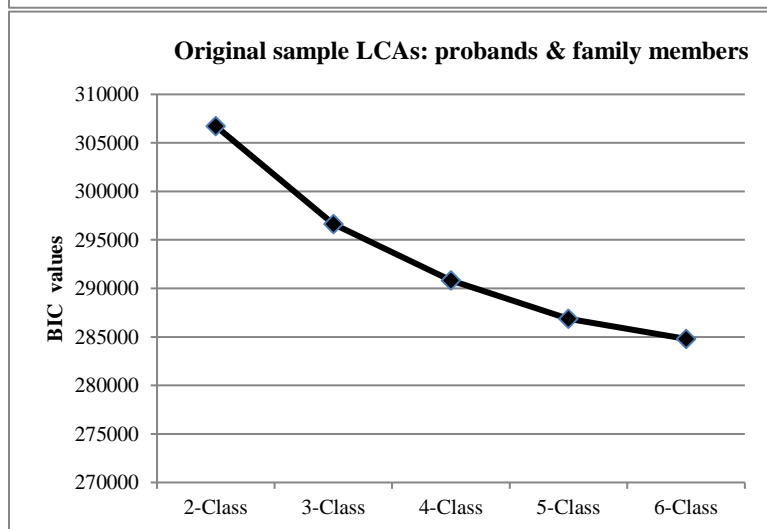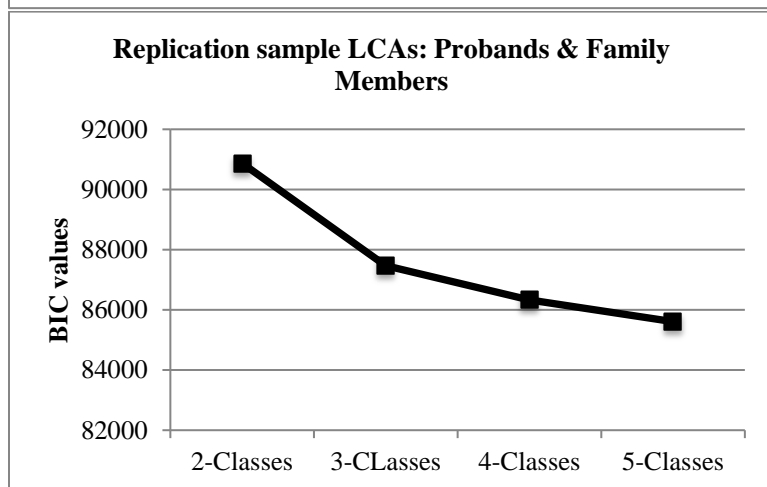

**SF3. Probabilities of endorsing symptoms for LCA classes: replication**

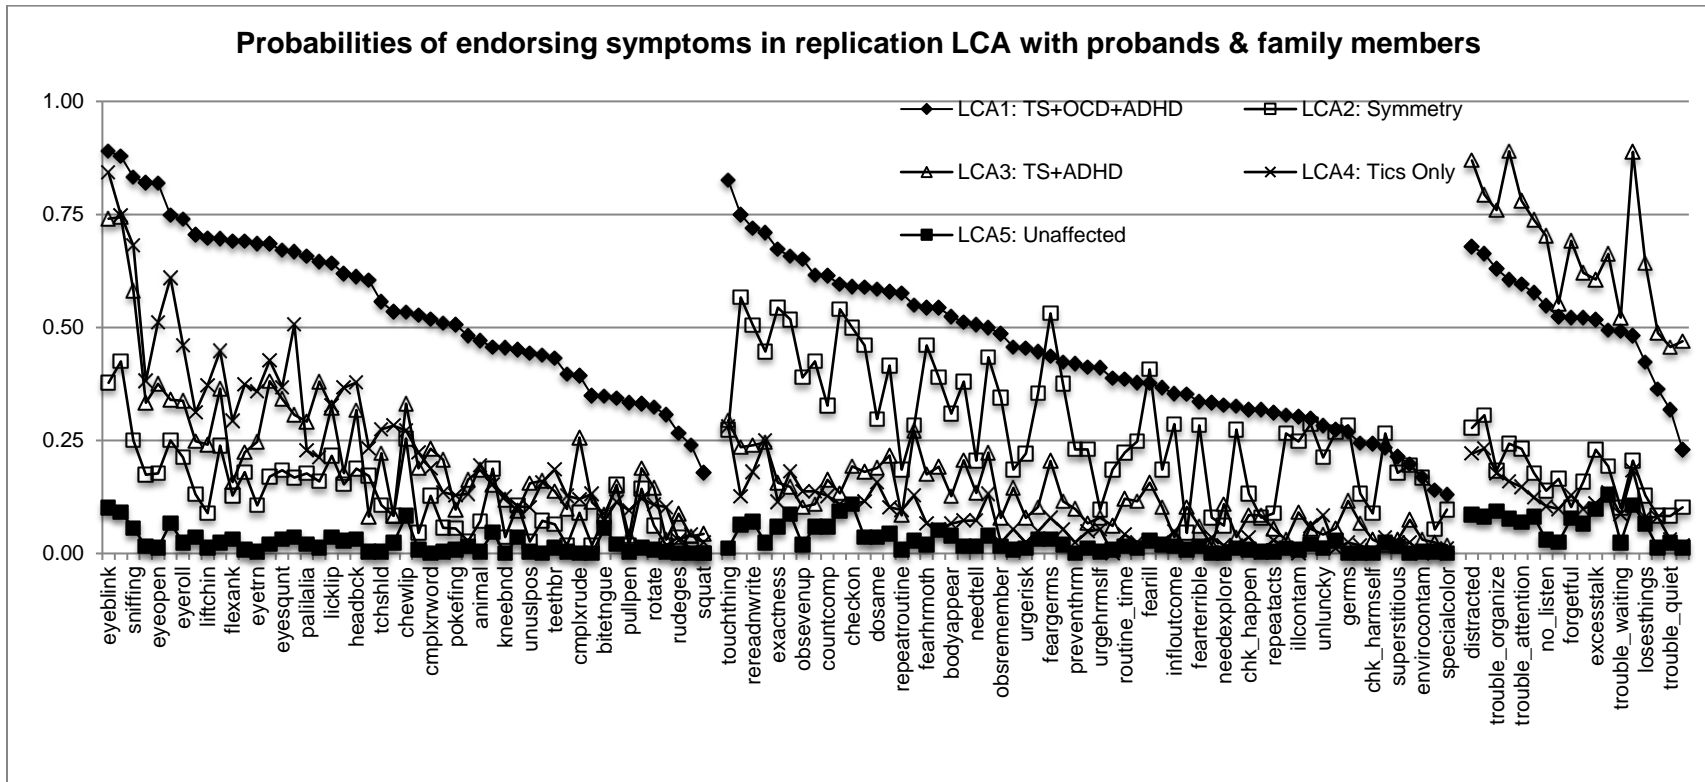

**SF4. The phenotypic variance of symmetry and disinhibition explained by TS, OCD and ADHD Polygenic Risk Scores (PRS)**

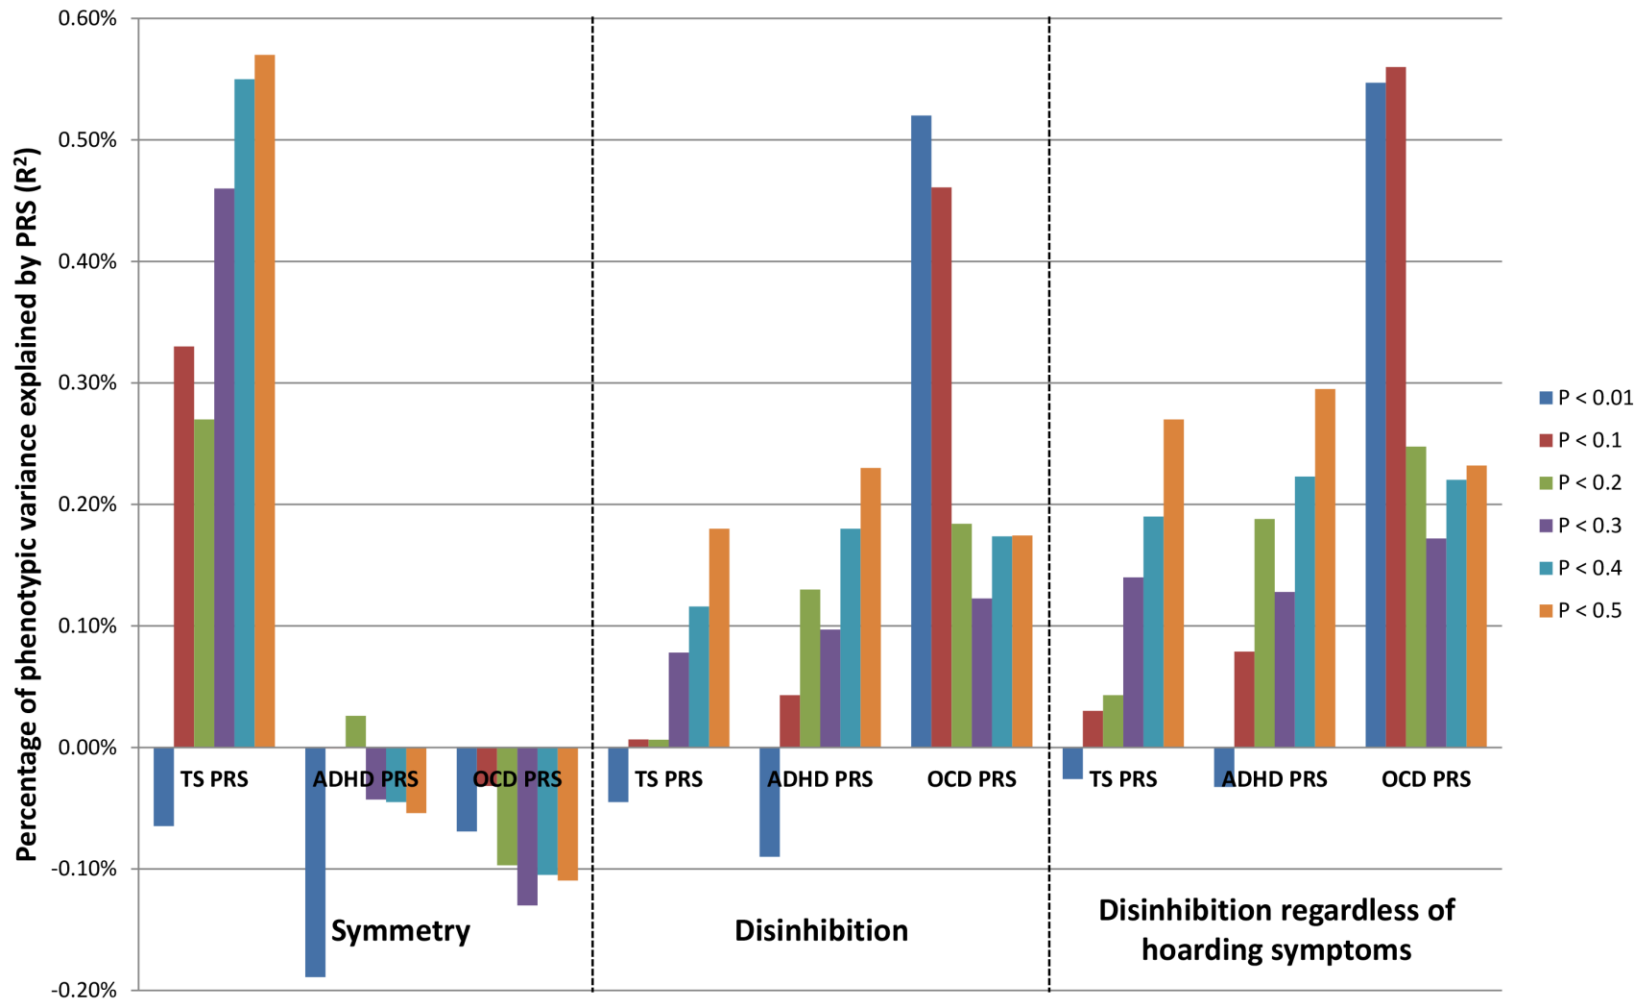

The y axis represents the percentage of phenotypic variance explained by PRS (i.e.  $R^2$ ). Negative  $R^2$ s indicate negative correlation between the target phenotype of interest and the discovery sample PRS.



## SR1: Supplemental References

1. Pauls, D.L., et al., *Gilles de la Tourette's syndrome and attention deficit disorder with hyperactivity. Evidence against a genetic relationship*. Archives of General Psychiatry, 1986. **43**(12): p. 1177-1179.
2. Leckman, J.F., et al., *The Yale Global Tic Severity Scale: initial testing of a clinician-rated scale of tic severity*. Journal of the American Academy of Child and Adolescent Psychiatry, 1989. **28**(4): p. 566-573.
3. Goodman, W.K., et al., *The Yale-Brown Obsessive Compulsive Scale. II. Validity*. Archives of General Psychiatry, 1989. **46**(11): p. 1012-1016.
4. Goodman, W.K., et al., *The Yale-Brown Obsessive Compulsive Scale. I. Development, use, and reliability*. Archives of General Psychiatry, 1989. **46**(11): p. 1006-1011.
5. Conners, C.K., *Rating scales in attention-deficit/hyperactivity disorder: use in assessment and treatment monitoring*. The Journal of clinical psychiatry, 1998. **59 Suppl 7**(Journal Article): p. 24-30.
6. Conners, C.K., D. Erhart, and E. Sparrow, *Conners' Adult ADHD Rating Scales, Technical Manual*. 1999, New York: Multi-Health Systems.
7. Swanson, J.M., *School-Based Assessments and Interventions for ADD Students*. 1992, Irvine, CA: KC Publishing.
8. First, M.B., et al., *Structured Clinical Interview for DSM-IV Axis I Disorders—Non-Patient Edition (SCID-I/NP, version 2.0)*. 1995, New York: Biometrics Research Department, New York State Psychiatric Institute.
9. Fyer, A., et al., *Schedule for Affective Disorders and Schizophrenia-Lifetime Version, Modified for the Study of Anxiety Disorders (SADS-LA)*. 1985, New York: Anxiety Disorders Clinic, New York State Psychiatric Institute.
10. Kaufman, J., et al., *Schedule for Affective Disorders and Schizophrenia for School-Age Children—Present and Lifetime Version (K-SADS-PL): initial reliability and validity data*. Journal of the American Academy of Child & Adolescent Psychiatry, 1997. **36**(7): p. 980-988.
11. Orvaschel, H., et al., *Comparison of the family history method to direct interview. Factors affecting the diagnosis of depression*. Journal of affective disorders, 1982. **4**(1): p. 49-59.
12. Davis, L.K., et al., *Partitioning the heritability of Tourette syndrome and obsessive compulsive disorder reveals differences in genetic architecture*. PLoS Genet, 2013. **9**(10): p. e1003864.
13. Scharf, J.M., et al., *Genome-wide association study of Tourette's syndrome*. Mol Psychiatry, 2013. **18**(6): p. 721-8.
14. Scharf, J.M. and G.a.T.G.c. the TSAICG, on behalf of, *An international, collaborative genome-wide association study of Tourette Syndrome in 14,000 individuals identifies a non-coding RNA expressed early in human brain development as a TS susceptibility gene*, in *65th Annual Meeting of the American Society of Human Genetics*. October 2015: Baltimore, MD.

15. Purcell, S.M., et al., *Common polygenic variation contributes to risk of schizophrenia and bipolar disorder*. *Nature*, 2009. **460**(7256): p. 748-52.
16. Stewart, S.E., et al., *Genome-wide association study of obsessive-compulsive disorder*. *Mol Psychiatry*, 2013. **18**(7): p. 788-98.
17. Neale, B.M., et al., *Meta-analysis of genome-wide association studies of attention-deficit/hyperactivity disorder*. *J Am Acad Child Adolesc Psychiatry*, 2010. **49**(9): p. 884-97.
